# Supplementary material for: Clinical Outcomes Of Beveled Tip, Ultra-High Speed, 25-Gauge Pars Plana Vitrectomy System
Source: Research Square preprint supplement (doi:10.21203/rs.3.rs-590252/v1), 2021-07-13
Supplement: Supplementary file 3 [file 374aabb810bdebddc7b4b6fa.xlsx]

## Sheet: Sheet1
Table 1. Beveled tip, ultra-high speed, 25-gauge pars plana vitrectomy system study data
PATIENT	AGE	GENDER	DIAGNOSIS	SURGICAL STEPS	# STEPS	CORE TIME	SHAVE TIME	PPV time	TOTAL OR TIME	IOP	# TIMES ANCILLARY	OBJECTIVE	WOUND	PAIN SCORE	PREOPERATIVE	MONTH 3	logMAR	ADVERSE	COMMENTS
	(yrs)					(secs)	(secs)	(secs)	(secs)	DAY 1	INSTRUMENT PLACED IN EYE	ACHIEVED?	LEAK?	(0 - 4)	DCVA	DCVA	CHANGE	EVENTS
1	29	M	VH	PPV, LX	2	186	180	366	756	4	2	Y	N	0	1.85387	0.39794	-1.45593	N
2	69	F	MH + ERM	PPV, ERM, ILM, LX, FAX, GT	6	372	177	549	2130	8	8	Y	N	0	2.30103	1	-1.30103	N
3	56	M	RRD	PPV, FAX, LX, GT	4	474	612	1086	2526	18	4	Y	N	0	2.60206	2.30103	-0.30103	N
4	62	M	RRD	PPV, FAX, LX, GT	4	300	708	1008	1956	10	3	Y	N	0	2.60206	1.30103	-1.30103	N
5	61	F	VH	PPV, LX	2	240	360	600	1350	8	2	Y	N	0	1.85387	0.39794	-1.45593	N
6	57	F	RRD	PPV, FAX, LX, GT	4	120	978	1098	2676	18	3	Y	N	0	2.30103	1.30103	-1	Y	Redetachment
7	64	M	MH + ERM	PPV, ERM, ILM, FAX, LX, GT	6	270	549	819	3636	10	8	Y	N	0	2.30103	1	-1.30103	N
8	34	M	RRD	PPV, FAX, LX, ST	4	246	882	1128	3078	6	7	Y	N	0	1.85387	1.30103	-0.552842	N
9	38	M	VH + ERM	PPV, ERM, FAX, LX	4	234	295.8	529.8	1506	17	5	Y	N	0	0.154902	0.154902	0	N
10	69	M	MH	PPV, ERM, ILM, FAX, LX, GT, AM	7	474	415.8	889.8	3786	8	7	Y	N	0	0.823909	0.09691	-0.726999	Y	Nicked retinal blood vessel
11	55	F	VH + ERM	PE, PPV, ERM, LX, FAX	5	246	302.4	548.4	1920	4	4	Y	N	1	0.69897	0.69897	0	N
12	74	F	DIS + VH	PPV, LX, RIOL	3	120	120	240	1686	7	4	Y	N	2	0.30103	0.30103	0	N
13	53	F	TRD + VH	PE, PPV, ERM, LX, FAX, LX	6	594	1782	2376	3726	19	4	Y	N	1	1.85387	1.30103	-0.552842	N
14	52	M	TRD + VH	PE, PPV, ERM	3	474	119.4	593.4	2250	10	5	Y	N	1	1.85387	1.30103	-0.552842	N
15	59	M	RRD + VH	PPV, ERM, FAX, LX	4	180	183	363	810	4	3	Y	N	0	1.85387	0.154902	-1.69897	N
16	54	M	MH, ERM	PPV, ERM, FAX, LX	4	120	180	300	1890	16	6	Y	N	0	0	0	0	N
17	16	F	RRD	PPV, ERM, FAX, LX, GT	5	180	400.2	580.2	3930	18	7	Y	N	0	2.60206	0.69897	-1.90309	N
18	63	M	VH + ERM	PPV, ERM, FAX, LX	4	120	120	240	1230	12	4	y	N	0	1.30103	0.30103	-1	N
19	77	F	ERM	PPV, ERM, LX, FAX	4	180	312	492	1398	0	6	Y	N	0	0.30103	0.30103	0	Y	Hypotony
20	63	M	VH	PPV, LX	2	297	408	705	1140	20	6	Y	N	1	1.85387	1	-0.853872	N
21	84	F	VIT	PPV, LX	2	237.6	246	483.6	798	4	2	Y	N	1	1.85387	0.69897	-1.1549	N
22	42	M	DIS	PPV, LX, RIOL, SIOL	4	240.6	180	420.6	2118	8	3	Y	N	0	0.30103	0	-0.30103	N
23	70	M	VH + RT	PPV, LX, FAX	3	180	234	414	768	14	2	Y	N	0	2.60206	1	-1.60206	N
24	61	F	ERM	PPV, ERM, LX, FAX	5	121.2	120	241.2	1446	9	7	Y	N	0	0.30103	0.154902	-0.146128	N
25	69	F	ERM	PPV, ERM, LX, FAX	4	118.8	120.6	239.4	1026	4	4	Y	N	0	0.173925	0.09691	-0.0770152	N
26	74	M	RLF	PPV	1	292.8	120	412.8	510	8	4	Y	N	0	0.173925	0	-0.173925	N
27	60	M	RRD	PPV, FAX, LX, GT	4	120	1188	1308	2640	4	3	Y	N	0	1.30103	0.69897	-0.60206	N
28	47	F	VH, TRD	PPV, ERM, ILM, FAX, LX, GT	6	236.4	426	662.4	3420	4	5	Y	N	0	2.30103	1.30103	-1	Y	IOP elevation
29	84	F	MH, ERM	PPV, ERM, ILM, FAX, LX, GT	6	60	240	300	2130	27	5	Y	N	0	0.69897	0.823909	0.124939	N
30	56	M	RRD	PPV, PE, PCIOL, ERM, FAX, LX, GT	7	359.4	546	905.4	2682	38	2	Y	N	0	0.69897	0.39794	-0.30103	Y	IOP elevation
31	34	M	TRD + VIT	PPV, PE, PCIOL, LX	4	240	300	540	708	5	3	Y	N	1	2.30103	2.30103	0	N
32	63	M	RRD	PPV, FAX, LX, GT	4	240	492	732	1668	4	4	Y	N	0	2.30103	2.30103	0	N		n
33	64	F	MH	PPV, ERM, LX, FAX	4	120	240	360	2676	0	7	Y	N	0	0.69897	0.69897	0	Y	Hypotony
34	52	F	VIT	PPV, MD, FAX	3	301.2	240	541.2	1686	14	3	Y	N	0	1.30103	0.522879	-0.778151	N
35	56	M	ERM	PPV, ERM, LX, FAX	4	120	120	240	1728	18	5	Y	N	0	0.173925	0	-0.173925	N
36	59	M	DIS	PPV, LX, RIOL	3	90	90	180	2010	2	8	Y	N	1	2.60206	2.60206	0	Y	Hypotony
37	62	F	MH	PPV, PE, PCIOL, ERM, ILM, FAX, LX, AM, GT	9	105	360	465	2286	15	8	Y	N	1	1.85387	1	-0.853872	N
38	38	F	VH	PPV, MD, FAX	3	138	144	282	768	12	1	Y	N	0	0.39794	0.259637	-0.138303	N
39	51	F	MH	PPV, ERM, ILM, FAX, LX	5	202.2	120	322.2	1116	16	3	Y	N	0	0.455932	0.221849	-0.234083	N
40	66	F	MH	PPV, ERM, ILM, FAX, LX, GT	6	150	180	330	2076	8	6	Y	N	0	0.39794	0.30103	-0.09691	N
41	62	F	RRD	PPV, FAX, LX, GT	4	82.8	589.2	672	2190	8	4	Y	N	0	0.481486	0.09691	-0.384576	N
42	64	M	ERM	PPV, ERM, ILM, FAX	4	120	120	240	1308	13	4	Y	N	0	1	1	0	N
43	65	M	MH	PPV, ERM, ILM, FAX, LX	5	72	165	237	1866	34	5	Y	N	0	1	1	0	Y	IOP elevation
44	44	M	VH	PPV, ERM, LX, FAX	4	90	120	210	918	23	3	Y	N	0	0.30103	0.154902	-0.146128	N
45	63	F	ERM	PPV, ERM, ILM, FAX, LX	5	120	120	240	1140	10	3	Y	N	0	0.30103	0.30103	0	N
46	38	M	RLF	PPV, LX	2	60	94.8	154.8	1425	16	2	Y	N	0	0.154902	0.30103	0.146128	N
47	55	F	TRD	PPV, PE, PCIOL, ERM, LX, FAX	6	180	150	330	1758	8	5	Y	N	0	1.85387	1.30103	-0.552842	N
48	62	F	MH	PPV, ERM, ILM, FAX, LX	5	120	120	240	2250	15	7	Y	N	0	0	0	0	N
49	52	M	VH	PPV, LX, FAX	3	60	120	180	930	11	2	Y	N	0	1.30103	0.481486	-0.819544	N
50	56	M	TRD + VH	PPV, PE, PCIOL, LX, ERM, FAX	6	180	120	300	3120	30	6	Y	N	0	1.30103	0.30103	-1	Y	IOP elevation
Mean	57.16				4.28	203.7	330.204	533.904	1890.9	11.98	4.48				1.23702	0.712567	-0.524457
SD	13.4534				1.52583	119.557	319.828	389.296	890.366	8.26966	1.91918				0.880797	0.656104	0.561911
ABBREVIATIONS
AE= Adverse Events
AM = Amniotic membrane
DCVA= Distance corrected visual acuity
DIS= Dislocated Intraocular lens
ERM = Epiretinal membrane
FAX= Fluid air exchange
GT = Gas tamponade
ILM = Internal limiting membrane
LX = Endolaser photocoagulation
INTRAOP= Intraoperative
MD = Membrane dissection
MH= Macular hole
OR= Operative
PPV= Pars plana vitrectomy
PREOP= Preoperative
RIOL= Removal of dislocated IOL
RLF= Retained lens fragments
RRD= Rhegmatogenous retinal detachment
SIOL= Secondary intraocular lens implantation
ST = Silicone oil tamponade
TRD= Traction retinal detachment
VH= Vitreous hemorrhage
VIT= Vitritis

## Sheet: Sheet2
post bcva	pre bcva		post bcva	pre bcva	Chang VA
0.4	0.014		0.4	0.014	0.386
0.1	0.005		0.1	0.005	0.095
0.005	0.0025		0.005	0.0025	0.0025
0.05	0.0025		0.05	0.0025	0.0475
0.4	0.014		0.4	0.014	0.386
0.05	0.005		0.05	0.005	0.045
0.1	0.005		0.1	0.005	0.095
0.05	0.014		0.05	0.014	0.036
0.7	0.7		0.7	0.7	0
0.8	0.15		0.8	0.15	0.65
0.2	0.2		0.2	0.2	0
0.5	0.5		0.5	0.5	0
0.05	0.014		0.05	0.014	0.036
0.05	0.014		0.05	0.014	0.036
0.7	0.014		0.7	0.014	0.686
1	1		1	1	0
0.2	0.0025		0.2	0.0025	0.1975
0.5	0.05		0.5	0.05	0.45
0.5	0.5		0.5	0.5	0
0.1	0.014		0.1	0.014	0.086
0.2	0.014		0.2	0.014	0.186
1	0.5		1	0.5	0.5
0.1	0.0025		0.1	0.0025	0.0975
0.7	0.5		0.7	0.5	0.2
0.8	0.67		0.8	0.67	0.13
1	0.67		1	0.67	0.33
0.2	0.05		0.2	0.05	0.15
0.05	0.005		0.05	0.005	0.045
0.15	0.2		0.15	0.2	-0.05
0.4	0.2		0.4	0.2	0.2
0.005	0.005		0.005	0.005	0
0.005	0.005		0.005	0.005	0
0.2	0.2		0.2	0.2	0
0.3	0.05		0.3	0.05	0.25
1	0.67		1	0.67	0.33
0.0025	0.0025		0.0025	0.0025	0
0.1	0.014		0.1	0.014	0.086
0.55	0.4		0.55	0.4	0.15
0.6	0.35		0.6	0.35	0.25
0.5	0.4		0.5	0.4	0.1
0.8	0.33		0.8	0.33	0.47
0.1	0.1		0.1	0.1	0
0.1	0.1		0.1	0.1	0
0.7	0.5		0.7	0.5	0.2
0.5	0.5		0.5	0.5	0
0.5	0.7		0.5	0.7	-0.2
0.05	0.014		0.05	0.014	0.036
1	1		1	1	0
0.33	0.05		0.33	0.05	0.28
0.5	0.05		0.5	0.05	0.45

## Sheet: Sheet3
												IOP Day 1	Pearson r	p value
												Number of Steps	0.293	0.0388*
												Core Time	0.02	0.8930ns
												Shave Time	0.05	0.7325 ns
												Total Or Time	0.178	0.2158 ns
												# Times Ancillary - Instrument Placed in the Eye	-0.066	0.6476 ns
