# Supplementary material for: Clinical Outcomes Of Beveled Tip, Ultra-High Speed, 25-Gauge Pars Plana Vitrectomy System
Source: Research Square preprint supplement (doi:10.21203/rs.3.rs-590252/v1), 2021-07-13
Supplement: Supplementary file 4 [file b93e66e5264b2d2357e7c23c.xlsx]

## Sheet: Sheet1
Table 2. Correlation Analysis of Surgical Variables
A. Number of Surgical Steps Versus	r value	p value
Total Operative Time	0.593	<0.0001*
Number of Times Ancillary Instrument Used	0.483	0.0004*
Postoperative Day 1 IOP	0.293	0.0388*
Shave Vitrectomy Time	0.195	0.1757
Core+Shave Victrectomy Time	0.195	0.1757
Core Vitrectomy Time	0.116	0.4241
logMAR change	0.046	0.7532
B. Number of Times Ancillary Instrument Used Versus	Pearson r	p value
Total Operative Time	0.535	0.0001*
Postoperative Day 1 IOP	-0.066	0.6476
Core Vitrectomy Time	0.044	0.7599
logMAR change	0.018	0.9006
Shave VItrectomy Time	-0.03	0.8362
Core+Shave Victrectomy Time	-0.011	0.9397
C. Postoperative Day 1 IOP Versus	r value	p value
Number of Surgical Steps	0.293	0.0388*
Total Operative Time	0.178	0.2158
Number of Times Ancillary I trument Used	-0.066	0.6476
Shave Time	0.05	0.7325
Core+Shave Victrectomy Time	0.047	0.7469
Core Time	0.02	0.893
D. Postoperative Pain Score Versus	r value	p value
Core Vitrectomy Time	0.156	0.2794
Number of Surgical Steps	-0.153	0.2897
Postoperative Day 1 IOP	-0.137	0.3432
Number of Times Ancillary I trument Used	0.093	0.5191
Core+Shave Victrectomy Time	0.0867	0.5492
Total Operative Time	-0.023	0.8734
Shave Vitrectomy Time	-0.002	0.9914
logMAR change	-0.066	0.6497
E.Total Vitrectomy Time (Core + Shave) Versus	r value	p value
Total Operative Time	0.5608	0.0001*
logMAR change	0.252	0.0773
Number of Surgical Steps	0.195	0.1757
Postoperative Day 1 IOP	0.047	0.7469
Number of Times Ancillary I trument Used	-0.011	0.9397
Postoperative Pain Score	-0.023	0.8734
F. logMAR change	r value	p value
Total OR TIME	0.234	0.1019
Shave Time	0.224	0.1174
Core Time	0.223	0.1194
PPV	0.252	0.0773
Number of Steps	0.046	0.7532
Number of instruments	0.018	0.9006
Pain	-0.066	0.6497
* significant
Abbreviation: IOP = Intraocular pressure
